# Supplementary material
Source: MDPI journal article supplement (https://www.mdpi.com/2079-9292/12/7/1727)
Supplement: s1 [file s1]

Archive with 3 entries (3 files):
- FS1.pdf
- FS2.pdf
- FS3.pdf
