# Supplementary material
Source: MDPI journal article supplement (https://www.mdpi.com/2079-9292/12/7/1727)
Supplement: s1 [file s1]

Multimedia Appendix 2. Quality assessment of included studies.

| Authors                 | Type study   | Screening Questions |     | Qualitative studies |     |     |     |     | Randomized controlled trials |     |     |     |     | Non-randomized studies |     |     |     |     | Quantitative descriptive studies |     |     |     |     | Mixed Methods studies |     |     |     |     |
|-------------------------|--------------|---------------------|-----|---------------------|-----|-----|-----|-----|------------------------------|-----|-----|-----|-----|------------------------|-----|-----|-----|-----|----------------------------------|-----|-----|-----|-----|-----------------------|-----|-----|-----|-----|
|                         |              | S1                  | S2  | 1,1                 | 1.2 | 1.3 | 1.4 | 1.5 | 2.1                          | 2.2 | 2.3 | 2.4 | 2.5 | 3.1                    | 3.2 | 3.3 | 3.4 | 3.5 | 4.1                              | 4.2 | 4.3 | 4.4 | 4.5 | 5.1                   | 5.2 | 5.3 | 5.4 | 5.5 |
| Castillo-Parra, [22]    | Qualitative  | Yes                 | Yes | Yes                 | Yes | Yes | Yes | Yes | -                            | -   | -   | -   | -   | -                      | -   | -   | -   | -   | -                                | -   | -   | -   | -   | -                     | -   | -   | -   | -   |
| Hallqvist, [23]         | Qualitative  | Yes                 | Yes | Yes                 | Yes | Yes | Yes | Yes | -                            | -   | -   | -   | -   | -                      | -   | -   | -   | -   | -                                | -   | -   | -   | -   | -                     | -   | -   | -   | -   |
| Jiménez-Rodríguez, [24] | Mixed Method | Yes                 | Yes | -                   | -   | -   | -   | -   | -                            | -   | -   | -   | -   | -                      | -   | -   | -   | -   | -                                | -   | -   | -   | -   | Yes                   | Yes | Yes | Yes | Yes |

| Type of study   | Study                 | Quantitative descriptive studies                                         |                                                             |                                        |                                           |                                                                               | Mixed methods studies                                                                                  |                                                                                                        |                                                                                                            |                                                                                                             |                                                                                                                         |
|-----------------|-----------------------|--------------------------------------------------------------------------|-------------------------------------------------------------|----------------------------------------|-------------------------------------------|-------------------------------------------------------------------------------|--------------------------------------------------------------------------------------------------------|--------------------------------------------------------------------------------------------------------|------------------------------------------------------------------------------------------------------------|-------------------------------------------------------------------------------------------------------------|-------------------------------------------------------------------------------------------------------------------------|
|                 |                       | 4.1. Is the sampling strategy relevant to address the research question? | 4.2. Is the sample representative of the target population? | 4.3. Are the measurements appropriate? | 4.4. Is the risk of nonresponse bias low? | 4.5. Is the statistical analysis appropriate to answer the research question? | 5.1. Is there an adequate rationale for using a mixed methods design to address the research question? | 5.2. Are the different components of the study effectively integrated to answer the research question? | 5.3. Are the outputs of the integration of qualitative and quantitative components adequately interpreted? | 5.4. Are divergences and inconsistencies between quantitative and qualitative results adequately addressed? | 5.5. Do the different components of the study adhere to the quality criteria of each tradition of the methods involved? |
| 1. Quantitative | Chuah et al. [60]     | Yes                                                                      | Yes                                                         | Yes                                    | Yes                                       | Yes                                                                           |                                                                                                        |                                                                                                        |                                                                                                            |                                                                                                             |                                                                                                                         |
| 2. Quantitative | Essmiller et al. [61] | Yes                                                                      | Yes                                                         | Yes                                    | Yes                                       | Yes                                                                           |                                                                                                        |                                                                                                        |                                                                                                            |                                                                                                             |                                                                                                                         |
| 5. Quantitative | Na et al. [64]        | Yes                                                                      | Yes                                                         | Yes                                    | Yes                                       | Yes                                                                           |                                                                                                        |                                                                                                        |                                                                                                            |                                                                                                             |                                                                                                                         |
| 6. Mixed method | Perryman et al. [65]  |                                                                          |                                                             |                                        |                                           |                                                                               | Yes                                                                                                    | Yes                                                                                                    | Yes                                                                                                        | Yes                                                                                                         | Yes                                                                                                                     |
