# Supplementary material
Source: MDPI journal article supplement (https://www.mdpi.com/2079-9292/12/7/1727)
Supplement: s1 [file s1]

**Multimedia Appendix 3.** Reasons for studies exclusion.

| Excluded                      | Reason for exclusion                                                                                                    |
|-------------------------------|-------------------------------------------------------------------------------------------------------------------------|
| Baptista et al. [19]          | No Metaverse-related technologies involved (an app was used for providing information to pregnant women).               |
| Burrai et al. [20]            | Study Protocol.                                                                                                         |
| Caballero-Galilea et al. [21] | No Metaverse-related technologies involved (a digital newsletter was used for providing information to pregnant women). |
